# Supplementary material for: Spontaneous generation of singlet oxygen on microemulsion-derived manganese oxides with rich oxygen vacancies for efficient aerobic oxidation
Source: Royal Society of Chemistry journal article supplement (doi:10.1039/d3sc04418a), 2023-01-01
Supplement: d3sc04418a1.pdf [file d3sc04418a1.pdf]

## 1. Experimental procedures

### 1.1 Materials

Sodium dodecyl benzene sulfonate (SDBS, AR grade), ethanol ( $\geq 99.5\%$ ), manganese (II) nitrate tetrahydrate ( $\text{Mn}(\text{NO}_3)_2 \cdot 4\text{H}_2\text{O}$ , 98%), sodium bicarbonate ( $\text{NaHCO}_3$ ,  $\geq 99.8\%$ ), urea (99%), potassium permanganate ( $\text{KMnO}_4$ , 99.0%), commercial manganese dioxide (C- $\text{MnO}_2$ ,  $\geq 90\%$ ), and manganese sulfate monohydrate ( $\text{MnSO}_4 \cdot \text{H}_2\text{O}$ , 99.0%) were purchased from Aladdin Co. Ltd. Xylene ( $\geq 99.0\%$ ) and toluene ( $\geq 99.5\%$ ) were acquired from Sinopharm Chemical Reagent Co., Ltd. 2,2,6,6-Tetramethyl-1-piperidinyloxy (TEMPO, 98%), 1,4-benzoquinone (BQ,  $\geq 98.0\%$ ), furfuryl alcohol (FA, 98%), and isopropanol (IPA,  $\geq 99.5\%$ ) were obtained from Sigma-Aldrich. 2,2,6,6-Tetramethylpiperidine (TEMP,  $\geq 99\%$ ) and 5,5-dimethyl-1-pyrroline *N*-oxide (DMPO,  $\geq 98.0\%$ ) used in the experiments were acquired from Dojindo Laboratories. All alcohols used as substrates were sourced from Energy Chemical.

### 1.2 Characterization

X-ray diffraction (XRD) spectra were obtained using a Bruker D8 Advance powder X-ray diffractometer (Bruker, Germany) equipped with Cu  $K\alpha$  radiation. The scanning angle range was  $10\text{-}80^\circ$ , and the scanning rate was  $5^\circ/\text{min}$ . X-ray photoelectron spectroscopy (XPS) spectra were recorded using a Thermo Scientific K-Alpha system (ThermoFischer, USA) with an Al  $K\alpha$  radiation source ( $h\nu=1486.6\text{ eV}$ ). Brunauer-Emmett-Teller (BET) surface area data were determined by analyzing adsorption with liquid  $\text{N}_2$  at  $-195.8^\circ\text{C}$  using an ASAP 2460 sorption instrument (Micromeritics, USA). Morphology observations of  $\text{N}_y\text{-MnO}_2$  were conducted using a high-resolution transmission electron microscope (TEM) Talos-F200S (FEI, USA). Hydrogen temperature-programmed reduction with  $\text{H}_2$  ( $\text{H}_2\text{-TPR}$ ) was carried out using an AMI-300 system (Altamira, USA). Samples were pretreated in  $\text{N}_2$  atmosphere and subsequently reduced in 10 vol.%  $\text{H}_2/\text{Ar}$  gas mixture at a flow rate of  $30\text{ mL}/\text{min}$ . Singlet oxygen ( $^1\text{O}_2$ ), superoxide anion ( $\cdot\text{O}_2^-$ ), and hydroxyl radical ( $\cdot\text{OH}$ ) generation activated by  $\text{N}_y\text{-MnO}_2$  were examined using a Bruker A300 electron paramagnetic resonance (EPR) spectroscopy (Bruker, Germany). Fourier Transform infrared (FTIR) spectra were acquired using a Thermo Scientific Nicolet iS50 spectrometer (ThermoFisher, USA). Dynamic light scattering (DLS) analysis was performed using a Malvern Zetasizer Nano ZS90. The conversion of alcohols and the selectivity of target products were determined using Gas chromatography (GC) on a PANNA A91Plus instrument (China).

### 1.3 Synthesis of $\epsilon\text{-MnO}_2$ by hydrothermal method

The synthesis of micrometer-size  $\epsilon\text{-MnO}_2$  without N doping was achieved using a hydrothermal method. A solution was prepared by dissolving  $\text{MnSO}_4 \cdot \text{H}_2\text{O}$  (0.17 g, 1 mmol) in a mixture of deionized water (70 mL) and ethanol (7 mL). Subsequently,  $\text{NaHCO}_3$  (0.84 g, 10 mmol) was added to the solution with stirring and allowed to stand for 3 h at room temperature. The resulting powder was carefully collected, dried, and then calcined at  $350^\circ\text{C}$  for 4 hours in an air environment to produce  $\epsilon\text{-MnO}_2$  catalyst.

### 1.4 Synthesis of $\epsilon\text{-MnO}_2$ nanocatalysts ( $\epsilon\text{-MnO}_2\text{-n}$ ) by microemulsion method

$\epsilon$ -MnO<sub>2</sub> nanocatalysts without N doping were synthesized using the microemulsion method. SDBS (10.5 g) was dissolved in xylene (90 mL) with the assistance of ultrasonication. Aqueous solutions of KMnO<sub>4</sub> (0.316 g, 2 mmol) in deionized water (1 mL) and MnSO<sub>4</sub>·H<sub>2</sub>O (1.44 g, 8.5 mmol) in deionized water (4.4 mL) were sequentially added to the oil phase mentioned earlier, followed by stirring for 0.5 hours. The resulting microemulsion was subjected to hydrothermal treatment at 160 °C for 12 hours. After drying at 80 °C for 12 hours, the obtained precursors were calcined at temperatures of 300, 350, 400, and 500 °C for 4 hours in an air environment, yielding the  $\epsilon$ -MnO<sub>2</sub>-*n*-*y* nanocatalyst, where *y* corresponds to the calcination temperature (300, 350, 400, and 500 °C).

### 1.5 Procedures of commercial activated MnO<sub>2</sub> (C-MnO<sub>2</sub>)

The standard procedure for activating C-MnO<sub>2</sub> is as follows: The C-MnO<sub>2</sub> sample was slowly heated to 350 °C at a rate of 2 °C/min and maintained at this temperature for 4 hours in an air atmosphere.

### 1.6 Procedures for kinetic experiments

In a Schlenk flask, N<sub>γ</sub>-MnO<sub>2</sub> (150 mg), toluene (5 mL), and benzyl alcohol (0.5 mmol) were combined. The reaction mixture was stirred using a magnetic stirrer at 1200 rpm while continuously bubbling oxygen (O<sub>2</sub>) into the solution (16 mL/min). The reaction was conducted at various temperatures (20, 25, 30, and 35 °C), and samples were withdrawn from the reaction mixture at specific times intervals (10, 20, 30, 40, and 50 min) for analysis using GC.

### 1.7 Procedures for EPR test

The qualitative and quantitative analysis of the generation of reactive oxygen species (ROS), including <sup>1</sup>O<sub>2</sub>, O<sub>2</sub><sup>·-</sup>, and ·OH, was performed using a Bruker A300 EPR spectrometer. The radiation frequency was set at 9.85 GHz, and a power of 20 mW was applied. The standard test procedures for assessing <sup>1</sup>O<sub>2</sub>, O<sub>2</sub><sup>·-</sup>, and ·OH in the absence of light were as follows.

#### Qualitative analysis of <sup>1</sup>O<sub>2</sub>, O<sub>2</sub><sup>·-</sup>, and ·OH:

For the <sup>1</sup>O<sub>2</sub> test, 30 mg of the catalyst was sonicated in 2 mL of deionized water to ensure uniform dispersion, followed by bubbling O<sub>2</sub> for 10 minutes. Subsequently, 30 μL of 2,2,6,6-Tetramethylpiperidine (TEMP) aqueous solution (200 mM) was added to the above dispersion. The concentration of <sup>1</sup>O<sub>2</sub> in the reaction mixture was determined at the end of the experiment. All <sup>1</sup>O<sub>2</sub> tests were conducted at room temperature without exposure to light.

5,5-Dimethyl-1-pyrroline *N*-oxide (DMPO) was employed as the capture agent for O<sub>2</sub><sup>·-</sup> and ·OH. To perform the tests, 30 mg of the catalyst was dispersed in the appropriate solvent. Subsequently, 30 μL DMPO solution (200 mM) was added to the dispersion. It is worth noting that methanol was used as the solvent used for O<sub>2</sub><sup>·-</sup> testing, while deionized water was employed for ·OH testing. All O<sub>2</sub><sup>·-</sup> and ·OH tests were conducted at room temperature without exposure to light.

#### Quantitative analysis of <sup>1</sup>O<sub>2</sub>:

For the <sup>1</sup>O<sub>2</sub> test, 30 mg of catalyst was sonicated in 2 mL of deionized water to ensure uniform dispersion,

followed by bubbling O<sub>2</sub> for 10 minutes. Subsequently, 30 μL of 2,2,6,6-tetramethylpiperidine (TEMP) aqueous solution (at concentrations of 50/100/200/250 mM) was added to the dispersion. Based on the experimental results, the optimal concentration of TEMP solution was found to be 200 mM. All <sup>1</sup>O<sub>2</sub> tests were conducted at room temperature without exposure to light.

### 1.8 Procedures for *in-situ* IR test

N<sub>y</sub>-MnO<sub>2</sub> nanocatalysts were compressed into sheets and placed inside a chamber with CaF<sub>2</sub> window. The samples underwent pretreatment at 120 °C for 2 hours under a protective N<sub>2</sub> atmosphere, followed by cooling to room temperature. These treated catalysts served as the background for data acquisition. Subsequently, benzyl alcohol (10 μL) was applied to the catalyst surface, and the adsorption data of the substrate were recorded.

For the chemisorption of O<sub>2</sub> onto the catalysts, the pretreatment procedures remained consistent with those described earlier. After collecting the background data, detailed spectra were obtained within an atmosphere of O<sub>2</sub>.

### 1.9 DFT calculation method

All calculations are conducted within the framework of density functional theory (DFT) using projection enhanced plane wave methods, as implemented in the Vienna ab initio simulation package.<sup>1</sup> For the exchange-correlation potential, we adopted the generalized gradient approximation proposed by Perdew, Burke and Ernzerhof.<sup>2</sup> To account for long-range van der Waals interactions, we employed the DFT-D3 method.<sup>3</sup> The plane wave cut-off energy was set to 420 eV. When solving the Kohn-Sham equation iteratively, an energy criterion of 10<sup>-5</sup> eV was applied. Brillouin zone integration was performed at the Gamma point using a 3×3×1 k-mesh grid. All structures were relaxed until the residual force on each atom decreased to below 0.03 eV·Å<sup>-1</sup>.

## 2. Figures and Tables

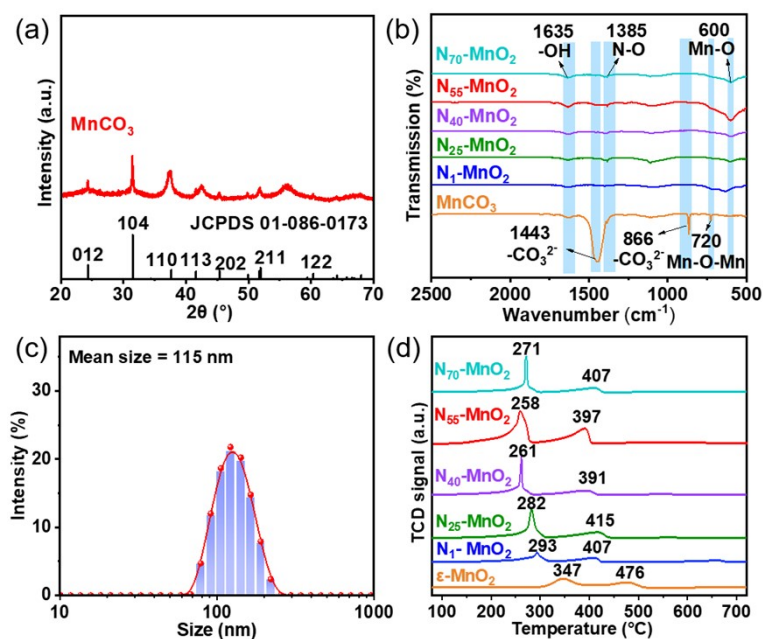

**Fig. S1** (a) XRD pattern of prepared catalyst precursor  $\text{MnCO}_3$ ; (b) FTIR spectra of  $\text{N}_y\text{-MnO}_2$  ( $y=1, 25, 40, 55, 70$ ), and  $\text{MnCO}_3$ ; (c) DLS analysis of  $\text{N}_{55}\text{-MnO}_2$  dispersed in ethanol; (d)  $\text{H}_2$ -TPR spectra of  $\text{N}_y\text{-MnO}_2$  ( $y=1, 25, 40, 55, 70$ ), and  $\epsilon\text{-MnO}_2$ .

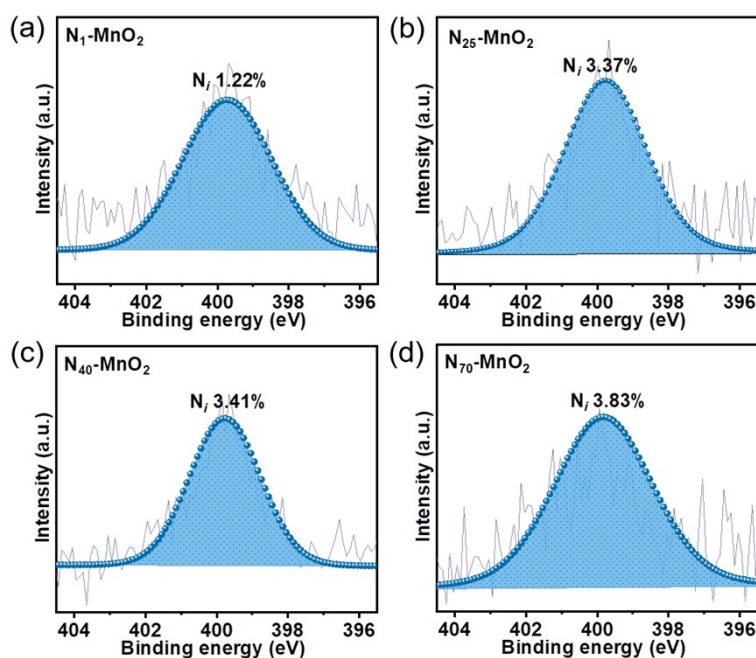

**Fig. S2**  $\text{N } 1s$  XPS spectra of (a)  $\text{N}_1\text{-MnO}_2$ , (b)  $\text{N}_{25}\text{-MnO}_2$ , (c)  $\text{N}_{40}\text{-MnO}_2$ , and (d)  $\text{N}_{70}\text{-MnO}_2$ .

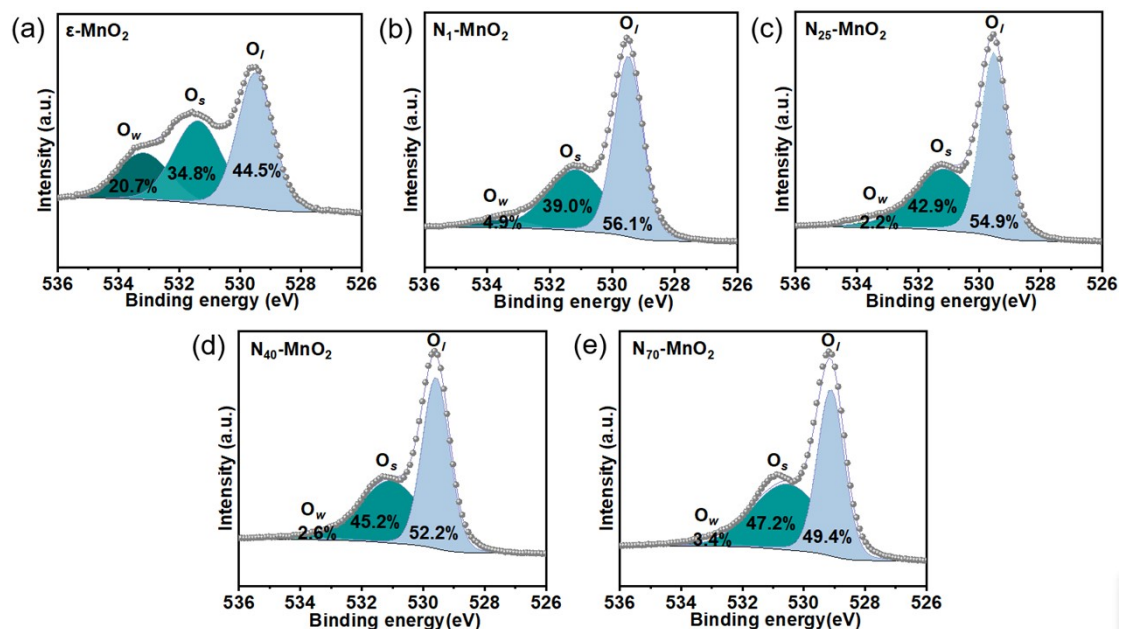

**Fig. S3** O 1s XPS spectra of (a)  $\epsilon$ -MnO<sub>2</sub>, (b) N<sub>1</sub>-MnO<sub>2</sub>, (c) N<sub>25</sub>-MnO<sub>2</sub>, (d) N<sub>40</sub>-MnO<sub>2</sub>, (e) N<sub>70</sub>-MnO<sub>2</sub>. The O1s can be fitted using lattice oxygen (O<sub>l</sub>), surface oxygen atoms (O<sub>s</sub>) in the vicinity of O<sub>l</sub>, and oxygen from water adsorption (O<sub>w</sub>), corresponding to the binding energies of 529.5, 531.4, and 533.2 eV, respectively.

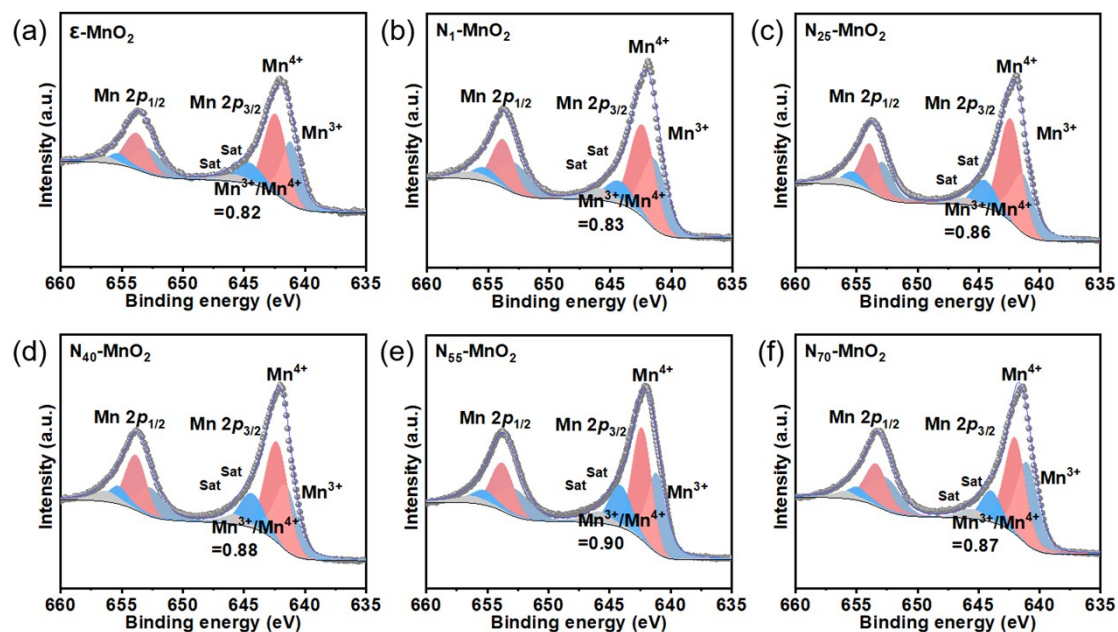

**Fig. S4** Mn 2p XPS spectra of (a)  $\epsilon$ -MnO<sub>2</sub>, (b) N<sub>1</sub>-MnO<sub>2</sub>, (c) N<sub>25</sub>-MnO<sub>2</sub>, (d) N<sub>40</sub>-MnO<sub>2</sub>, (e) N<sub>55</sub>-MnO<sub>2</sub>, and (f) N<sub>70</sub>-MnO<sub>2</sub>.

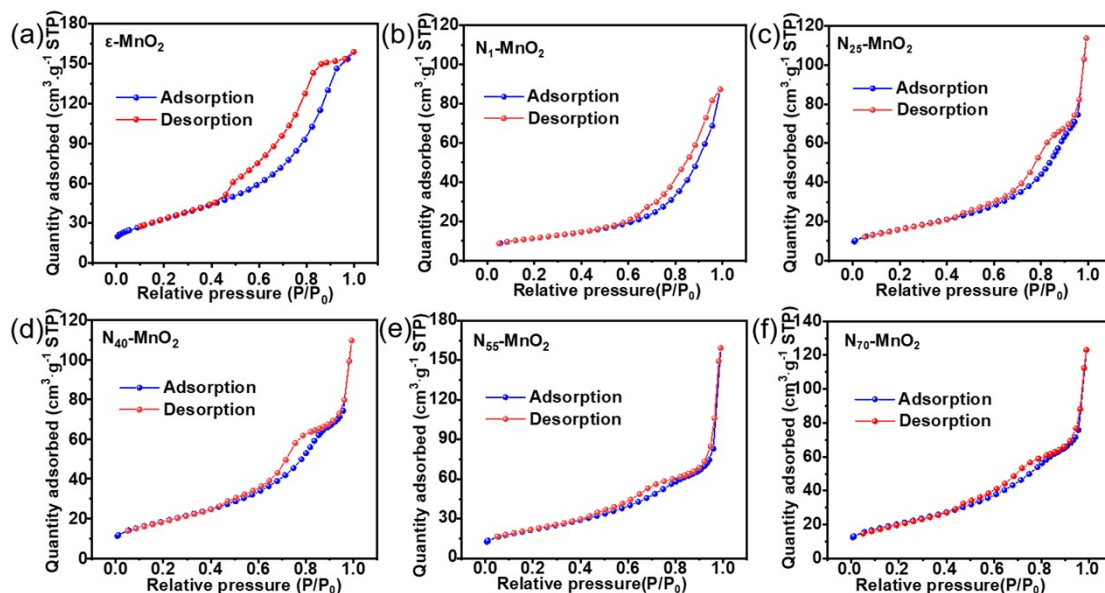

**Fig. S5** N<sub>2</sub> adsorption-desorption isotherms of (a)  $\epsilon$ -MnO<sub>2</sub>, (b) N<sub>1</sub>-MnO<sub>2</sub>, (c) N<sub>25</sub>-MnO<sub>2</sub>, (d) N<sub>40</sub>-MnO<sub>2</sub>, (e) N<sub>55</sub>-MnO<sub>2</sub>, and (f) N<sub>70</sub>-MnO<sub>2</sub>.

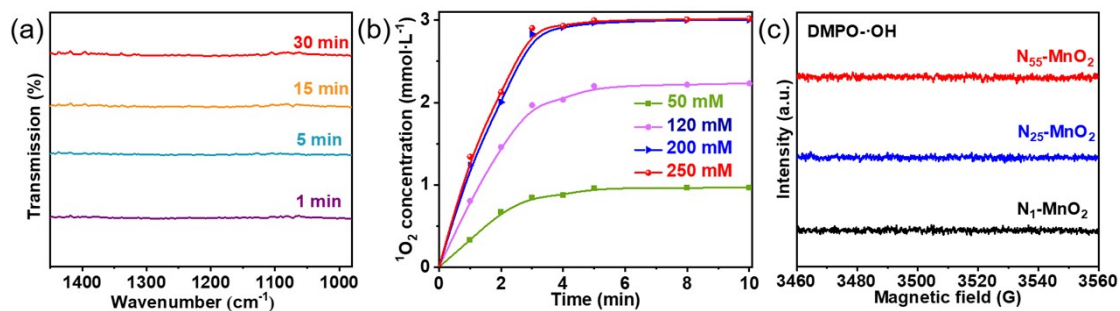

**Fig. S6** (a) *In-situ* IR spectra of O<sub>2</sub> adsorbed onto the surface of N<sub>55</sub>-MnO<sub>2</sub> in O<sub>2</sub> + H<sub>2</sub>O vapor atmosphere; (b) <sup>1</sup>O<sub>2</sub> concentration detected with different TEMP concentrations; (c) EPR spectra of DMPO-OH triggered by N<sub>1</sub>-MnO<sub>2</sub>, N<sub>25</sub>-MnO<sub>2</sub> and N<sub>55</sub>-MnO<sub>2</sub>.



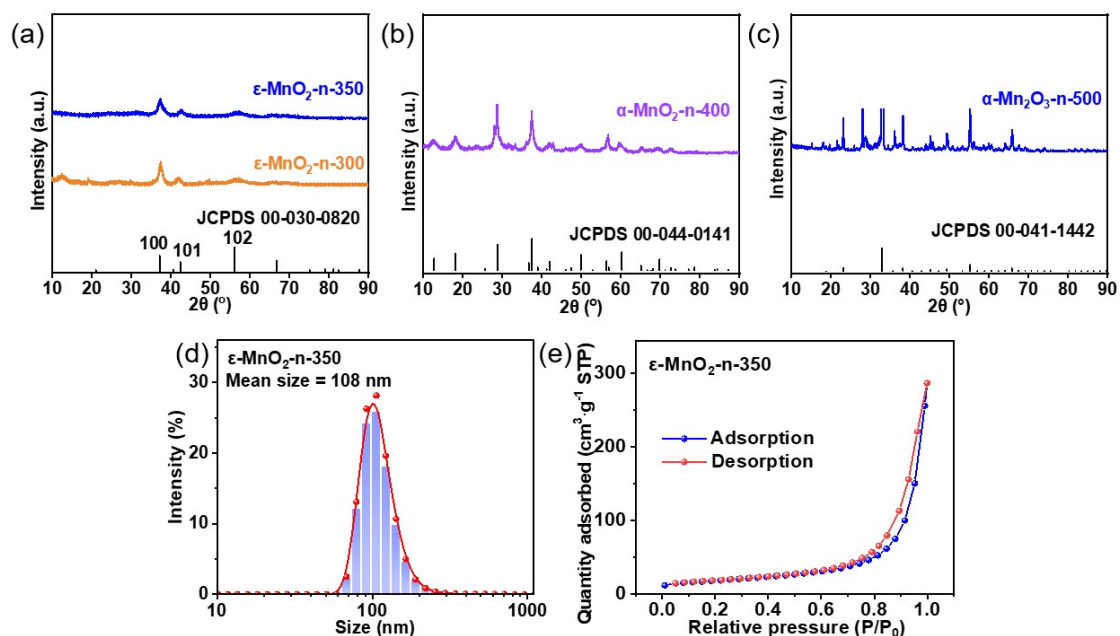

**Fig. S7** XRD patterns of (a)  $\epsilon$ -MnO<sub>2</sub>-n-300 and  $\epsilon$ -MnO<sub>2</sub>-n-350, (b)  $\alpha$ -MnO<sub>2</sub>-n-400 and (c)  $\alpha$ -Mn<sub>2</sub>O<sub>3</sub>-n-500; (d) DLS result of  $\epsilon$ -MnO<sub>2</sub>-n-350; (e) BET result of  $\epsilon$ -MnO<sub>2</sub>-n-350.

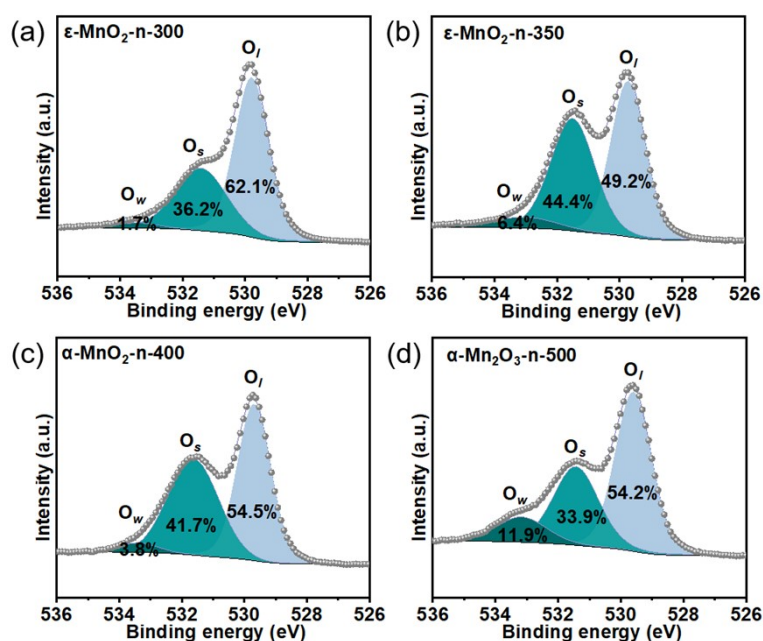

**Fig. S8** O 1s XPS spectra of (a)  $\epsilon$ -MnO<sub>2</sub>-n-300, (b)  $\epsilon$ -MnO<sub>2</sub>-n-350, (c)  $\epsilon$ -MnO<sub>2</sub>-n-400, and (d)  $\alpha$ -Mn<sub>2</sub>O<sub>3</sub>-n-500.

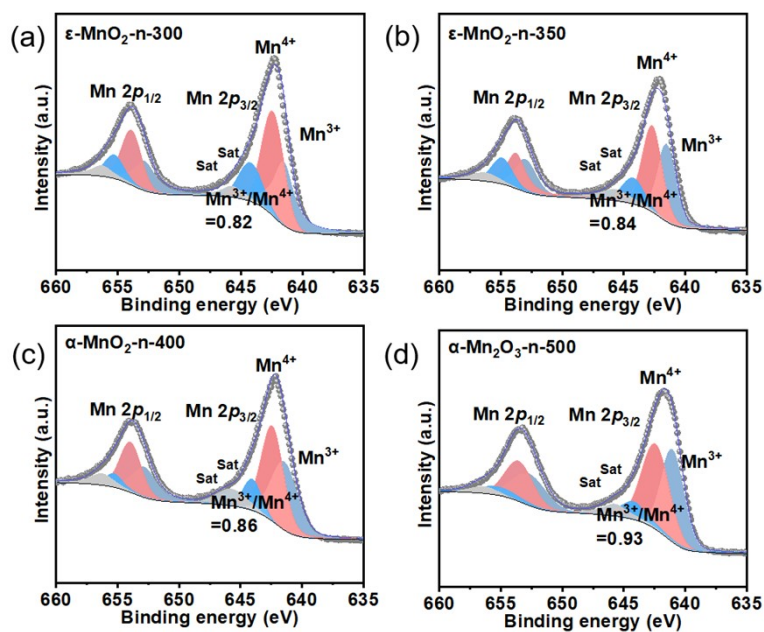

**Fig. S9** Mn 2p XPS spectra of (a)  $\epsilon$ -MnO<sub>2</sub>-n-300, (b)  $\epsilon$ -MnO<sub>2</sub>-n-350, (c)  $\epsilon$ -MnO<sub>2</sub>-n-400, and (d)  $\alpha$ -Mn<sub>2</sub>O<sub>3</sub>-n-500.

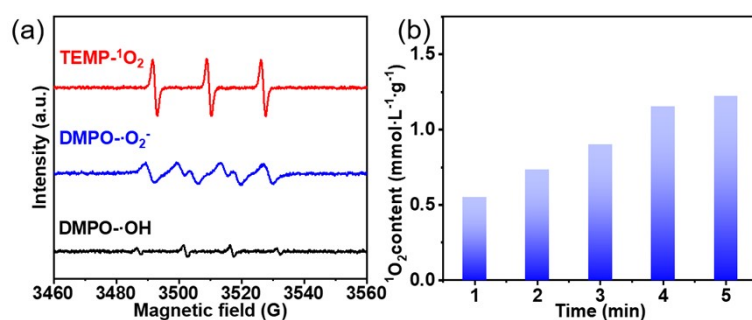

**Fig. S10** (a) The EPR characteristic peaks of TEMP-<sup>1</sup>O<sub>2</sub>, DMPO-<sup>•</sup>O<sub>2</sub><sup>-</sup> and DMPO-<sup>•</sup>OH generated by  $\epsilon$ -MnO<sub>2</sub>-n-350; (b) <sup>1</sup>O<sub>2</sub> content in  $\epsilon$ -MnO<sub>2</sub>-n-350 suspension (TEMP concentration: 200 mM).



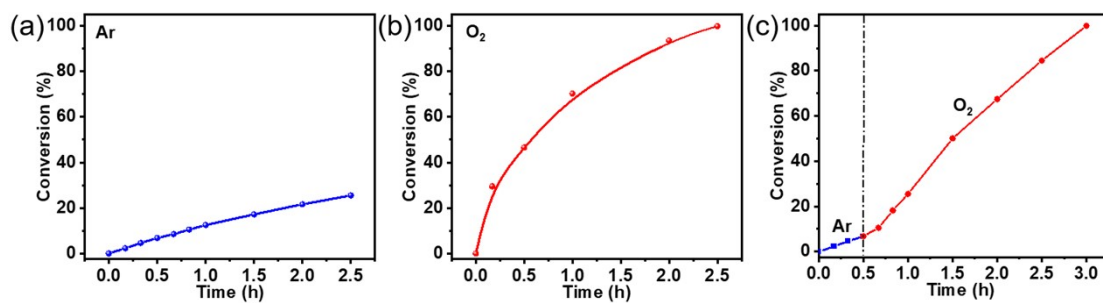

**Fig. S11** The comparison of catalytic performance of  $N_{55}\text{-MnO}_2$  under (a) Ar, (b)  $\text{O}_2$ , and (c) Ar +  $\text{O}_2$  atmosphere.

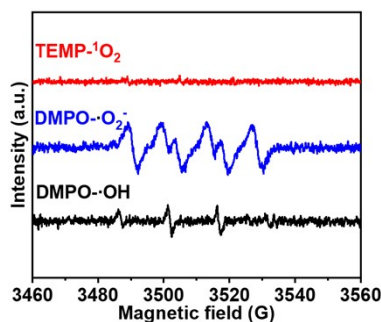

**Fig. S12** The EPR characteristic peaks of  $\text{TEMP-}^1\text{O}_2$ ,  $\text{DMPO-}\cdot\text{O}_2^-$  and  $\text{DMPO-}\cdot\text{OH}$  generated by  $\varepsilon\text{-MnO}_2$ .

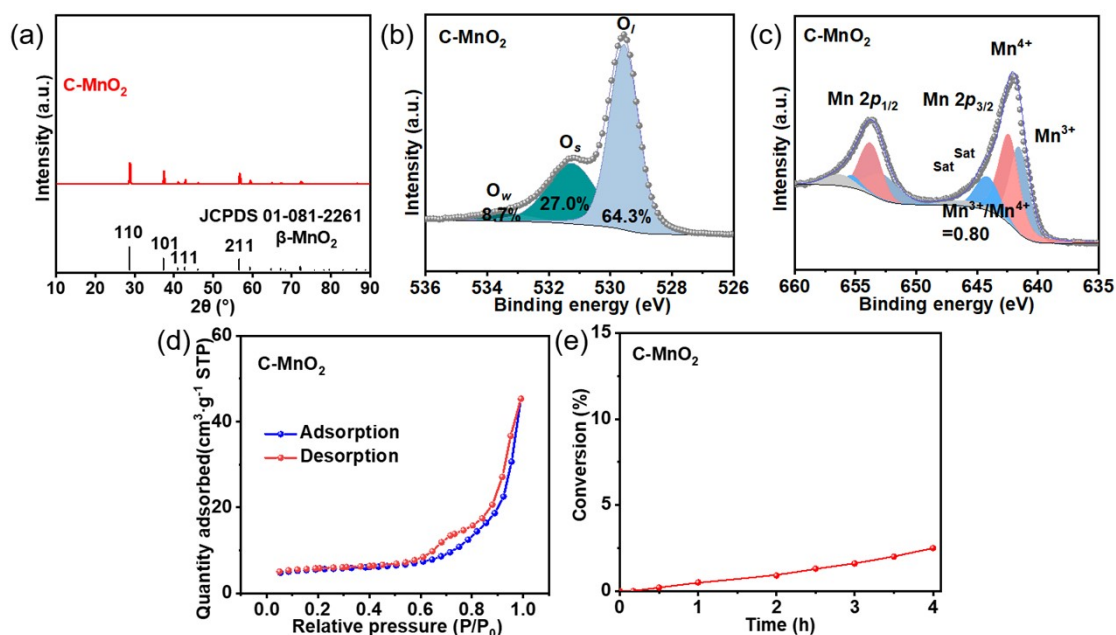

**Fig. S13** (a) XRD pattern of  $\text{C-MnO}_2$ ; (b) O 1s and (c) Mn 2p XPS spectra of  $\text{C-MnO}_2$ ; (d) BET result of  $\text{C-MnO}_2$ ; (e) catalytic performance of activated  $\text{C-MnO}_2$  mediated aerobic oxidation of benzyl alcohol.

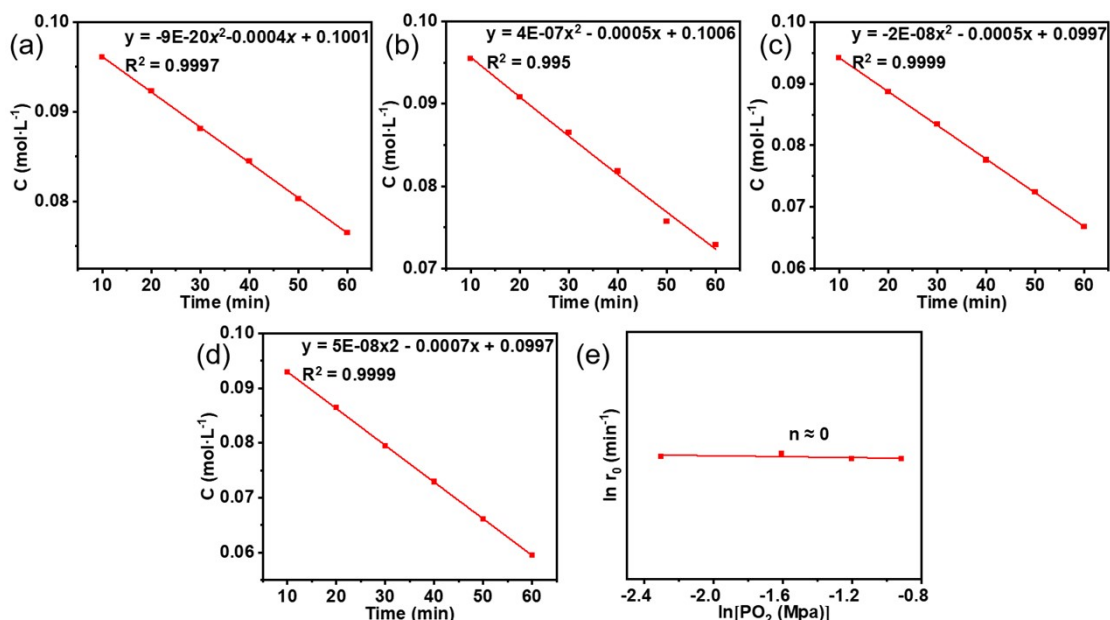

**Fig. S14** Polynomial fitting of benzyl alcohol concentration ( $C$ ) and reaction time ( $t$ ) under pressure of (a) 0.1 MPa, (b) 0.2 MPa, (c) 0.3 MPa, and (d) 0.4 MPa; (e) relationship between  $r_0$  and  $O_2$  pressure using  $N_{55}\text{-MnO}_2$  as a catalyst.

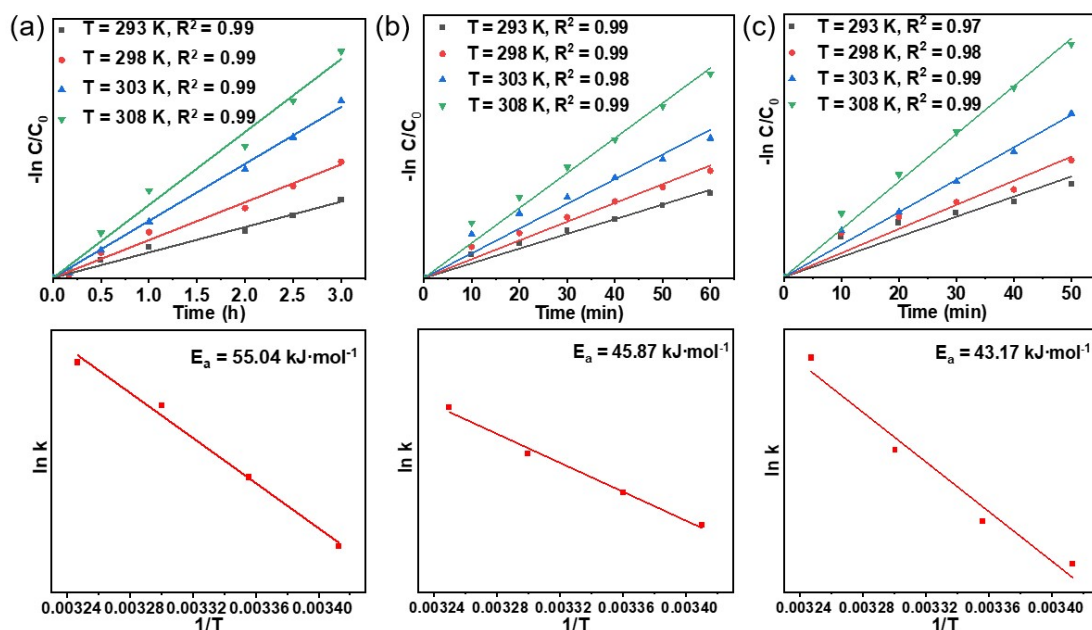

**Fig. S15** The kinetic experiments results of (a)  $N_1\text{-MnO}_2$ , (b)  $N_{25}\text{-MnO}_2$ , and (c)  $N_{55}\text{-MnO}_2$  at different reaction temperature.

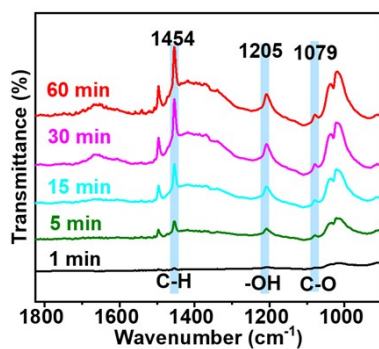

**Fig. S16** *In-situ* IR spectra of benzyl alcohol adsorbed on the surface of activated C-MnO<sub>2</sub>.

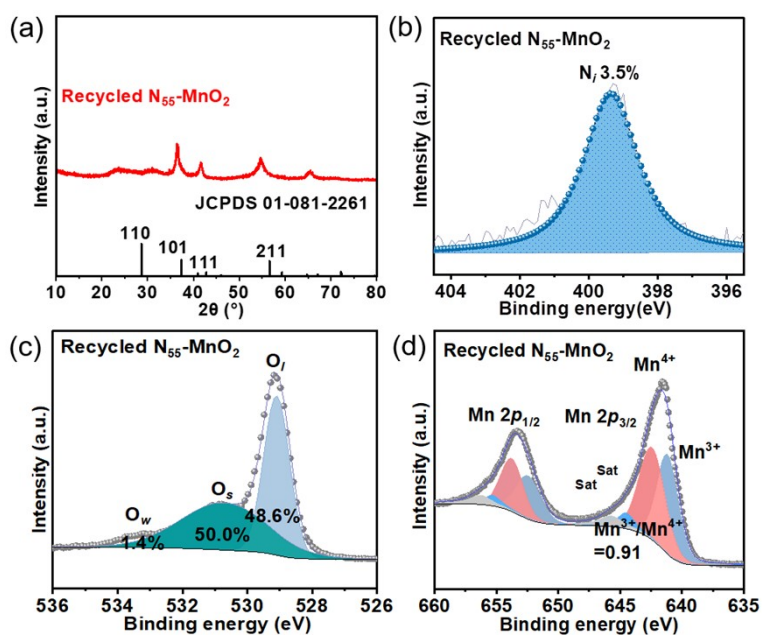

**Fig. S17** (a) XRD pattern of recycled N<sub>55</sub>-MnO<sub>2</sub>; (b) N 1s, (c) O 1s, and (d) Mn 2p XPS spectra of recycled N<sub>55</sub>-MnO<sub>2</sub>.

**Table S1** XPS analysis results of N<sub>y</sub>-MnO<sub>2</sub> (y=1, 25, 40, 55, 70).

| Entry | Catalyst                                       | N (mol%) | Mn <sup>3+</sup> /Mn <sup>4+</sup> | O <sub>s</sub> (%) <sup>a</sup> |
|-------|------------------------------------------------|----------|------------------------------------|---------------------------------|
| 1     | N <sub>1</sub> -MnO <sub>2</sub>               | 1.22     | 0.83                               | 39.0                            |
| 2     | N <sub>25</sub> -MnO <sub>2</sub>              | 3.37     | 0.86                               | 42.9                            |
| 3     | N <sub>40</sub> -MnO <sub>2</sub>              | 3.41     | 0.88                               | 45.2                            |
| 4     | N <sub>55</sub> -MnO <sub>2</sub>              | 3.52     | 0.90                               | 51.1                            |
| 5     | N <sub>70</sub> -MnO <sub>2</sub>              | 3.83     | 0.87                               | 47.2                            |
| 6     | Recycled N <sub>55</sub> -<br>MnO <sub>2</sub> | 3.51     | 0.91                               | 50.0                            |
| 7     | C-MnO <sub>2</sub>                             | /        | 0.80                               | 27.0                            |
| 8     | ε-MnO <sub>2</sub>                             | /        | 0.82                               | 34.8                            |
| 9     | ε-MnO <sub>2</sub> -n-350                      | /        | 0.84                               | 44.4                            |

**Table S2** The concentration of O<sub>s</sub> and proportion of Mn with different valence of Mn-based catalyst.

| Entry | Catalyst                                           | O <sub>s</sub> (%) | Mn <sup>3+</sup> /Mn <sup>4+</sup> | Ref.      |
|-------|----------------------------------------------------|--------------------|------------------------------------|-----------|
| 1     | Mg-MnO <sub>2</sub>                                | 40                 | 0.69                               | 4         |
| 2     | ε-MnO <sub>2</sub>                                 | 23                 | 1.27                               | 5         |
| 3     | ε-MnO <sub>2</sub>                                 | 21.3               | 0.45                               | 6         |
| 4     | N-Mn <sub>x</sub> Co <sub>3-x</sub> O <sub>4</sub> | 45                 | 1.01                               | 7         |
| 5     | NEG                                                | 38.6               | /                                  | 8         |
| 6     | MnO <sub>2</sub> @GdO <sub>x</sub>                 | 45                 | 0.91                               | 9         |
| 7     | N-MnO <sub>2</sub>                                 | 37.1               | 0.83                               | 10        |
| 8     | 8K/MnO <sub>2</sub>                                | 36.3               | 0.56                               | 11        |
| 9     | MnO <sub>2</sub> /AC-N <sub>2</sub>                | 41.5               | 1.25                               | 12        |
| 10    | La-MnO <sub>2</sub>                                | 34.6               | 0.35                               | 13        |
| 11    | N <sub>55</sub> -MnO <sub>2</sub>                  | 51.1               | 0.90                               | This work |

**Table S3** BET results of  $N_y$ - $MnO_2$  ( $y=1, 25, 40, 55, 70$ ), C- $MnO_2$ ,  $\epsilon$ - $MnO_2$ , and  $\epsilon$ - $MnO_2$ -n-350.

| Entry | Catalysts                       | Surface Area ( $m^2/g$ ) | Pore Volume ( $cm^3/g$ ) | Pore Size (nm) |
|-------|---------------------------------|--------------------------|--------------------------|----------------|
| 1     | $N_1$ - $MnO_2$                 | 39.7                     | 0.11                     | 10.06          |
| 2     | $N_{25}$ - $MnO_2$              | 57.5                     | 0.18                     | 11.25          |
| 3     | $N_{40}$ - $MnO_2$              | 67.4                     | 0.17                     | 9.19           |
| 4     | $N_{55}$ - $MnO_2$              | 78.7                     | 0.25                     | 11.41          |
| 5     | $N_{70}$ - $MnO_2$              | 74.2                     | 0.19                     | 9.29           |
| 6     | $\epsilon$ - $MnO_2$            | 121.1                    | 0.24                     | 8.1            |
| 7     | $\epsilon$ - $MnO_2$ -n-<br>350 | 64.8                     | 0.44                     | 21.35          |
| 8     | C- $MnO_2$                      | 17.7                     | 0.07                     | 15.68          |

**Table S4** The control experiment for the N<sub>55</sub>-MnO<sub>2</sub> catalyzed aerobic oxidation of benzyl alcohol with different quenchers and under various atmospheres.

| Entry          | Catalysts                         | Quenchers | Atmosphere     | Conversion (%) | Selectivity (%) |
|----------------|-----------------------------------|-----------|----------------|----------------|-----------------|
| 1 <sup>a</sup> | N <sub>55</sub> -MnO <sub>2</sub> | /         | O <sub>2</sub> | >99.9          | >99.9           |
| 2 <sup>a</sup> | N <sub>55</sub> -MnO <sub>2</sub> | TEMPO     | O <sub>2</sub> | 26             | >99.9           |
| 3 <sup>a</sup> | N <sub>55</sub> -MnO <sub>2</sub> | BQ        | O <sub>2</sub> | 85             | >99.9           |
| 4 <sup>a</sup> | N <sub>55</sub> -MnO <sub>2</sub> | FA        | O <sub>2</sub> | 7              | >99.9           |
| 5 <sup>a</sup> | N <sub>55</sub> -MnO <sub>2</sub> | IPA       | O <sub>2</sub> | 96             | >99.9           |
| 6 <sup>b</sup> | N <sub>55</sub> -MnO <sub>2</sub> | /         | N <sub>2</sub> | 31             | >99.9           |
| 7 <sup>c</sup> | N <sub>55</sub> -MnO <sub>2</sub> | /         | O <sub>2</sub> | >99.9          | >99.9           |
| 8 <sup>d</sup> | N <sub>55</sub> -MnO <sub>2</sub> | /         | O <sub>2</sub> | >99.9          | >99.9           |
| 9 <sup>e</sup> | N <sub>55</sub> -MnO <sub>2</sub> | /         | Ar             | 25.5           | >99.9           |

<sup>a</sup> Reaction conditions: 5.0 mL of toluene, 0.5 mmol of alcohols, 150.0 mg of N<sub>55</sub>-MnO<sub>2</sub>, 1200 rpm, 25.0 ± 1.0 °C, O<sub>2</sub> flow 16.0 mL·min<sup>-1</sup> 1.0 bar, reaction time 2.5 h, quencher 1.0 mmol;

<sup>b</sup> N<sub>2</sub> bubbling 16.0 mL·min<sup>-1</sup>, 1.0 bar;

<sup>c</sup> in dark, O<sub>2</sub> flow 16.0 mL·min<sup>-1</sup> 1.0 bar;

<sup>d</sup> light irradiation, O<sub>2</sub> flow 16.0 mL·min<sup>-1</sup> 1.0 bar;

<sup>e</sup> Ar bubbling 16.0 mL·min<sup>-1</sup>, 1.0 bar.



**Table S5** Turnover frequency (TOF) values of C-MnO<sub>2</sub>, ε-MnO<sub>2</sub>, ε-MnO<sub>2</sub>-n-350, and N<sub>y</sub>-MnO<sub>2</sub> (y=1, 25, 40, 55, 70).

| Entry | Catalysts                         | TOF (mmol·g <sup>-1</sup> <sub>cat</sub> ·h <sup>-1</sup> ) | Selectivity (%) |
|-------|-----------------------------------|-------------------------------------------------------------|-----------------|
| 1     | C-MnO <sub>2</sub>                | 0.002                                                       | 95.0            |
| 2     | ε-MnO <sub>2</sub>                | 0.019                                                       | 95.0            |
| 3     | ε-MnO <sub>2</sub> -n-350         | 0.021                                                       | 99.0            |
| 4     | N <sub>1</sub> -MnO <sub>2</sub>  | 0.023                                                       | 99.0            |
| 5     | N <sub>25</sub> -MnO <sub>2</sub> | 0.05                                                        | 99.2            |
| 6     | N <sub>40</sub> -MnO <sub>2</sub> | 0.10                                                        | 99.5            |
| 7     | N <sub>55</sub> -MnO <sub>2</sub> | 0.14                                                        | >99.9           |
| 8     | N <sub>70</sub> -MnO <sub>2</sub> | 0.12                                                        | 99.5            |

TOF: moles of benzyl alcohol converted per mole of catalyst/reaction time (h), calculated at reaction time of 2.0 h.

**Table S6** The catalytic conversion of benzyl alcohol using N<sub>55</sub>-MnO<sub>2</sub> under varying O<sub>2</sub> pressure.

| P(MPa)  | 0.1  | 0.2  | 0.3  | 0.4  |
|---------|------|------|------|------|
| t (min) |      |      |      |      |
| 10      | 3.9  | 4.5  | 5.8  | 7.1  |
| 20      | 7.7  | 9.2  | 11.3 | 13.6 |
| 30      | 11.9 | 13.5 | 16.6 | 20.6 |
| 40      | 15.5 | 18.2 | 22.4 | 27.1 |
| 50      | 19.7 | 24.3 | 27.6 | 33.9 |
| 60      | 23.5 | 27.1 | 33.2 | 40.5 |

Reaction temperature: 25.0 ± 1.0 °C

**Table S7** The correlation between the benzyl alcohol concentration in the reaction mixture and the O<sub>2</sub> pressure (P).

| P(MPa)  | 0.1    | 0.2    | 0.3    | 0.4    |
|---------|--------|--------|--------|--------|
| t (min) |        |        |        |        |
| 10      | 0.0961 | 0.0955 | 0.0942 | 0.0929 |
| 20      | 0.0923 | 0.0908 | 0.0887 | 0.0864 |
| 30      | 0.0881 | 0.0865 | 0.0834 | 0.0794 |
| 40      | 0.0845 | 0.0818 | 0.0776 | 0.0729 |
| 50      | 0.0803 | 0.0757 | 0.0724 | 0.0661 |
| 60      | 0.0765 | 0.0729 | 0.0668 | 0.0595 |

Reaction temperature: 25.0 ± 1.0 °C

**Table S8** The initial reaction rate ( $r_0$ ) for the oxidation of benzyl alcohol catalyzed by  $N_{55}\text{-MnO}_2$  at varying  $\text{O}_2$  pressure.

| Entry | P (MPa) | $r_0$  |
|-------|---------|--------|
| 1     | 0.1     | 0.1001 |
| 2     | 0.2     | 0.1000 |
| 3     | 0.3     | 0.0997 |
| 4     | 0.4     | 0.0997 |

**Experiment analysis:** We conducted the oxidation of benzyl alcohol was conducted at different  $\text{O}_2$  pressures (P, ranging from 0.1-0.4 MPa). The detailed data regarding the conversion of benzyl alcohol are provided in **Table S6**, while the corresponding benzyl alcohol concentration (C) was shown in **Table S7**. In **Fig. S14**, we performed polynomial fitting on the C versus reaction time (t) to calculate  $r_0$  ( $r = -dC/dt$ ).<sup>14-16</sup> The polynomial derivative in **Figure S12** yields  $r_0$  at  $t = 0$ , as shown in **Table S8**. To assess the influence of  $\text{O}_2$  pressure, we fitted a curve relating  $\text{O}_2$  pressure and  $r_0$ , resulting in an approximate reaction order (n) of 0 (**Fig. S14e**). These results indicate that the reaction rate is nearly independent of  $\text{O}_2$  pressure.

**Table S9** The results of N<sub>55</sub>-MnO<sub>2</sub>-catalyzed aerobic oxidation of benzyl alcohol.

| Entry | t (min) | T (K) | Oxidant        | Conversion (%) | Selectivity (%) |
|-------|---------|-------|----------------|----------------|-----------------|
| 1     | 10      | 303   | O <sub>2</sub> | 10.05          | >99.9           |
| 2     | 20      | 303   | O <sub>2</sub> | 13.8           | >99.9           |
| 3     | 30      | 303   | O <sub>2</sub> | 19.65          | >99.9           |
| 4     | 40      | 303   | O <sub>2</sub> | 24.9           | >99.9           |
| 5     | 50      | 303   | O <sub>2</sub> | 31.2           | >99.9           |

**Table S10** The kinetic data for the N<sub>55</sub>-MnO<sub>2</sub>-catalyzed aerobic oxidation of benzyl alcohol.

| Entry | t (min) | Conversion (%) | C <sub>0</sub> (mol·L <sup>-1</sup> ) | C (mol·L <sup>-1</sup> ) | $\ln \frac{C_{A,0}}{C_A}$ |
|-------|---------|----------------|---------------------------------------|--------------------------|---------------------------|
| 1     | 0       | 0              | 0.1                                   | 0.1                      | 0                         |
| 2     | 10      | 10.05          | 0.1                                   | 0.08995                  | 0.10592                   |
| 3     | 20      | 13.8           | 0.1                                   | 0.0862                   | 0.1485                    |
| 4     | 30      | 19.65          | 0.1                                   | 0.08035                  | 0.21878                   |
| 5     | 40      | 24.9           | 0.1                                   | 0.0751                   | 0.28634                   |
| 6     | 50      | 31.2           | 0.1                                   | 0.0688                   | 0.37397                   |

**Experiment analysis:** The results of the oxidation of benzyl alcohol by N<sub>55</sub>-MnO<sub>2</sub> at 303 K are presented in the **Tables S9** and **S10**. We assume that the oxidation reaction follows a first-order kinetics model. If there

is a linear relationship between  $\ln \frac{C_{A,0}}{C_A}$  and t, then the above assumption is valid.<sup>17,18</sup> A linear regression analysis yielded a correlation coefficient (R<sup>2</sup>) of 0.99 and a reaction rate constant of k=0.0074 s<sup>-1</sup>, confirming that the reaction indeed follows first-order kinetics. The activation energies (E<sub>a</sub>) of N<sub>1</sub>-MnO<sub>2</sub>, N<sub>25</sub>-MnO<sub>2</sub> and N<sub>55</sub>-MnO<sub>2</sub> catalysts were calculated using the Arrhenius equation based on kinetic data obtained at different reaction temperatures (**Fig. S15** and **Tables S11-S13**). The calculated activation energies were 55.04 kJ·mol<sup>-1</sup>, 45.87 kJ·mol<sup>-1</sup>, 43.17 kJ·mol<sup>-1</sup>, respectively.

**Table S11** The kinetic data for the N<sub>1</sub>-MnO<sub>2</sub>-catalyzed aerobic oxidation of benzyl alcohol.

| Entry | T (K) | k<br>(min <sup>-1</sup> ) | R <sup>2</sup> |
|-------|-------|---------------------------|----------------|
| 1     | 293   | 0.0392                    | 0.99           |
| 2     | 298   | 0.0583                    | 0.99           |
| 3     | 303   | 0.0879                    | 0.99           |
| 4     | 308   | 0.1125                    | 0.99           |

**Table S12** The kinetic data for the N<sub>25</sub>-MnO<sub>2</sub>-catalyzed aerobic oxidation of benzyl alcohol.

| Entry | T (K) | k<br>(min <sup>-1</sup> ) | R <sup>2</sup> |
|-------|-------|---------------------------|----------------|
| 1     | 293   | 0.0025                    | 0.99           |
| 2     | 298   | 0.0032                    | 0.99           |
| 3     | 303   | 0.0043                    | 0.98           |
| 4     | 308   | 0.006                     | 0.99           |

**Table S13** The kinetic data for the N<sub>55</sub>-MnO<sub>2</sub>-catalyzed aerobic oxidation of benzyl alcohol.

| Entry | T (K) | k<br>(min <sup>-1</sup> ) | R <sup>2</sup> |
|-------|-------|---------------------------|----------------|
| 1     | 293   | 0.0046                    | 0.97           |
| 2     | 298   | 0.0055                    | 0.98           |
| 3     | 303   | 0.0074                    | 0.99           |
| 4     | 308   | 0.0109                    | 0.99           |

**Table S14** Comparison of TOF values between N<sub>55</sub>-MnO<sub>2</sub> and the reported catalysts.

| Entry | Catalyst                                         | Oxidant                                     | Alcohol | Light    | Oxygen species                                                         | T (°C) | t (h) | Conv. (%) | Sel. (%) | TOF (mol <sub>cat</sub> <sup>-1</sup> ·h <sup>-1</sup> ) | Ref.      |
|-------|--------------------------------------------------|---------------------------------------------|---------|----------|------------------------------------------------------------------------|--------|-------|-----------|----------|----------------------------------------------------------|-----------|
| 1     | Mg-OMS-1(MnO <sub>2</sub> )                      | O <sub>2</sub> (1 bar)                      | BA      | /        | /                                                                      | 50     | 24    | 92        | >99.9    | 0.08                                                     | 4         |
| 2     | ε-MnO <sub>2</sub>                               | O <sub>2</sub> (10 bar), NaHCO <sub>3</sub> | HMF     | /        | /                                                                      | 100    | 24    | 74        | >99.9    | 0.01                                                     | 5         |
| 3     | N-CoMn <sub>2</sub> O <sub>4</sub>               | Air                                         | BA      | λ>420 nm | <sup>1</sup> O <sub>2</sub> / <sup>•</sup> O <sub>2</sub> <sup>-</sup> | 30     | 0.5   | >99.9     | >99.9    | 1.2                                                      | 19        |
| 4     | TiO <sub>2</sub> /Ti <sub>3</sub> C <sub>2</sub> | O <sub>2</sub> (1 bar)                      | BA      | λ>420 nm | <sup>•</sup> O <sub>2</sub> <sup>-</sup>                               | 15     | 5     | 97        | 98       | 0.01                                                     | 20        |
| 5     | N-MnO <sub>2</sub>                               | O <sub>2</sub> (1 bar)                      | HMF     | /        | /                                                                      | 25     | 6     | >99.9     | >99.9    | 0.05                                                     | 21        |
| 6     | N-MnO <sub>2</sub>                               | O <sub>2</sub> (1 bar)                      | BA      | /        | /                                                                      | 30     | 4     | >99.9     | >99.9    | 0.07                                                     | 22        |
| 7     | ov-Bi <sub>2</sub> O <sub>3</sub>                | O <sub>2</sub> (1 bar)                      | BA      | UV-vis   | <sup>1</sup> O <sub>2</sub>                                            | 25     | 5     | 41        | 89       | 0.04                                                     | 23        |
| 8     | TTEPY (pyridinium)                               | Air                                         | PNA     | λ=395 nm | /                                                                      | 25     | 5     | 90        | 94       | /                                                        | 24        |
| 9     | β-MnO <sub>2</sub>                               | O <sub>2</sub> (1 bar)                      | BA      | /        | /                                                                      | 50     | 5     | 92        | >99.9    | 0.13                                                     | 25        |
| 10    | Co <sub>3</sub> O <sub>4</sub>                   | O <sub>2</sub> (1 bar)                      | BA      | /        | /                                                                      | 100    | 3     | 97.5      | >99.9    | 0.10                                                     | 26        |
| 11    | N <sub>55</sub> -MnO <sub>2</sub>                | O <sub>2</sub> (1 bar)                      | BA      | /        | <sup>1</sup> O <sub>2</sub>                                            | 25     | 2     | 93.6      | >99.9    | 0.14                                                     | This work |

BA: benzyl alcohol; HMF: 5-Hydroxymethylfurfural; PNA: p-nitrobenzyl alcohol.

## Reference:

1. G. Kresse and D. Joubert, *Phys. Rev. B*, 1999, **59**, 1758-1775.
2. J. P. Perdew, K. Burke and M. Ernzerhof, *Phys. Rev. Lett.*, 1996, **77**, 3865-3868.
3. S. Grimme, J. Antony, S. Ehrlich and H. Krieg, *J. Chem. Phys.*, 2010, **132**, 154104.
4. M. Koutani, E. Hayashi, K. Kamata and M. Hara, *J. Am. Chem. Soc.*, 2022, **144**, 14090-14100.
5. E. Hayashi, Y. Yamaguchi, K. Kamata, N. Tsunoda, Y. Kumagai, F. Oba and M. Hara, *J. Am. Chem. Soc.*, 2019, **141**, 890-900.
6. R. Yang, Z. Guo, L. Cai, R. Zhu, Y. Fan, Y. Zhang, P. Han, W. Zhang, X. Zhu, Q. Zhao, Z. Zhu, C. Chan and Z. Zeng, *Small*, 2021, **17**, 2103052.
7. Y. Jin, F. Li, P. Cui, Y. Yang, Q. Ke, M. N. Ha, W. Zhan, F. Ruan, C. Wan, Z. Lei, V.N. Nguyen, W. Chen and J. Tang, *Nano Res.*, 2021, **14**, 2637-2643.
8. Z. Zhang, S. Li, B. Zhao, X. Zhang, X. Wang, Z. Wen, S. Ji and J. Sun, *J. Phys. Chem. C*, 2021, **125**, 20195-20203.
9. L. Liu, R. Liu, T. Xu, Q. Zhang, Y. Tan, Q. Zhang, J. Ding and Y. Tang, *Inorg. Chem.*, 2020, **59**, 14407-14414.
10. T. He, X. Zeng, S. Rong, *J. Mater. Chem. A*, 2020, **8**, 8383-8396.
11. S. Rong, K. Li, P. Zhang, F. Liu and J. Zhang, *Catal. Sci. Technol.*, 2018, **8**, 1799-1812.
12. Y. Huang, Y. Liu, W. Wang, M. Chen, H. Li, S. Lee, W. Ho, T. Huang and J. Cao, *Appl. Catal. B-Environ.*, 2020, **278**, 119294.
13. L. Yu, H. Chen, Z. Wen, M. Jin, X. Ma, Y. Li, Y. Sang, M. Chen and Y. Li, *Ind. Eng. Chem. Res.*, 2021, **60**, 1624-1632.
14. V. D. Makwana, Y. C. Son, A. R. Howell, S. L. Suib, *J. Catal.*, 2002, **210**, 46-52.
15. L. Kang, X. Liu, A. Wang, L. Li, Y. Ren, X. Li, X. Pan, Y. Li, X. Zong, H. Liu, A. I. Frenkel, T. Zhang, *Angew. Chem. Int. Ed.*, 2020, **59**, 12909-12916.
16. A. Abad, A. Corma, H. García, *Chem. Eur. J.*, 2008, **14**, 212-222.
17. L. Zhang, R. Chen, Y. Tu, X. Gong, X. Cao, Q. Xu, Y. Li, B. Ye, Y. Ye and J. Zhu, *ACS Catal.*, 2023, **13**, 2202-2213.
18. Q. Wang, L. Chen, S. Guan, X. Zhang, B. Wang, X. Cao, Z. Yu, Y. He, D. G. Evans, J. Feng and D. Li, *ACS Catal.*, 2018, **8**, 3104-3115.
19. H. Li, Y. Zhang, J. Tang, G. Huang, P. Cui and Q. Ke, *Green Syn. Catal.*, 2022, <https://doi.org/10.1016/j.gresc.2022.09.005>.
20. X. Bao, H. Li, Z. Wang, F. Tong, M. Liu, Z. Zheng, P. Wang, H. Cheng, Y. Liu, Y. Dai, Y. Fan, Z. Li and B. Huang, *Appl. Catal. B-Environ.*, 2021, **286**, 119885.
21. Q. Ke, Y. Jin, F. Ruan, M.N. Ha, D. Li, P. Cui, Y. Cao, H. Wang, T. Wang, X. Han, X. Wang and P. Cui, *Green Chem.*, 2019, **21**, 4313-4318.



22. F. Ruan, F. Li, Z. Dong, Q. Ke, Y. Jin, W. Zhan, M.N. Ha and J. Tang, *Green Syn. Catal.*, 2021, **2**, 38-44.
23. J. Wang, X. Xu, Y. Liu, Z. Wang, P. Wang, Z. Zheng, H. Cheng, Y. Dai and B. Huang, *ChemSusChem*, 2020, **13**, 3488-3494.
24. S. Ma, J. Cui, C. Rao, M. Jia, Y. Chen and J. Zhang, *Green Chem.*, 2021, **23**, 1337-1343.
25. Y. Yamaguchi, R. Aono, E. Hayashi, K. Kamata and M. Hara, *ACS Appl. Mater. Interfaces*, 2020, **12**, 36004-36013.
26. K. Li, Y. Pei, P. Xiao, Z. He, S. A. C. Carabineiro, H. Jiang and J. Zhu, *ACS Appl. Nano Mater.*, 2022, **5**, 3722-3732.
